# Supplementary material for: Leaf-venation-directed cellular alignment for macroscale cardiac constructs with tissue-like functionalities
Source: PubMed Central journal article supplement (PMC10097867; doi:10.1038/s41467-023-37716-1), 2023-04-12
Supplement: 41467_2023_37716_MOESM3_ESM.pdf [file 41467_2023_37716_MOESM3_ESM.pdf]

## **Description of additional supplementary files**

**Supplementary Movie 1.** Fluo-8 AM staining to demonstrate the calcium transients in the primary-channel region of LVD neonatal rat cardiac tissues after 5 days of culture.

**Supplementary Movie 2.** Fluo-8 AM staining to demonstrate the calcium transients in the branch-channel region of LVD neonatal rat cardiac tissues after 5 days of culture.

**Supplementary Movie 3.** Fluo-8 AM staining to demonstrate the calcium transients in the primary-channel region of control neonatal rat cardiac tissues after 5 days of culture.

**Supplementary Movie 4.** Fluo-8 AM staining to demonstrate the calcium transients in the branch-channel region of control neonatal rat cardiac tissues after 5 days of culture.

**Supplementary Movie 5.** Beating of LVD cardiac tissue from hiPSC-CMs after 2 days of culture.

**Supplementary Movie 6.** Delivery and fibrin-based fixation of 3D LVD constructs to the *ex-vivo* porcine heart.
